# Supplementary material for: The Constructing of the Oxide Phase Diagram for Fluoride Adsorption on La-Fe-Al: A Collaborative Study of Density Functional Calculation and Experimentation
Source: MDPI journal article supplement (doi:10.3390/nano14070619), 2024-04-01
Supplement: s1 [file s1]

## Supplementary Material

# The Constructing of the Oxide Phase Diagram for Fluoride Adsorption on La-Fe-Al: A Collaborative Study of Density Functional Calculation and Experimentation

Shaojian Xie <sup>1,†</sup>, Yao Xiao <sup>1,†</sup>, Lei Huang <sup>1,\*</sup>, Jiaxin Li <sup>1</sup>, Jia Yan <sup>1</sup>, Qian Li <sup>1</sup>, Meng Li <sup>1</sup>  
and Hongguo Zhang <sup>1,2,\*</sup>

<sup>1</sup> School of Environmental Science and Engineering, Guangzhou University, Guangzhou Higher Education Mega Center, Guangzhou 510006, China

<sup>2</sup> Guangzhou University-Linköping University Research Center on Urban Sustainable Development, Guangzhou University, Guangzhou 510006, China

\* Correspondence: huanglei@gzhu.edu.cn (L.H.); hg Zhang@gzhu.edu.cn (H.Z.)

<sup>†</sup> These authors contributed equally to this work.

### **Supplementary Figures:**

**Figure S1.** Fluoride ions adsorption kinetics curves of La-Fe-Al ternary composite oxides.

**Figure S2.** Fitting curve of Elovich kinetic model.

**Figure S3.** Fitting curve of Dubinin-Radushkevich model.

**Figure S4.** Removal efficiency of La-Fe-Al ternary composite oxides under competition of different anions.

**Figure S5.** The TG diagram before and after adsorption of La-Fe-Al ternary composite oxides.

**Figure S6.** High-resolution map of Al 2p.

**Figure S7.** The density changes of s orbital states of La before and after adsorption.

**Figure S8.** The density changes of p orbital states of La before and after adsorption.

**Figure S9.** The density changes of d orbital states of La before and after adsorption.

**Figure S10.** The density changes of s orbital states of Fe before and after adsorption.

**Figure S11.** The density changes of p orbital states of Fe before and after adsorption.

**Figure S12.** The density changes of d orbital states of Fe before and after adsorption.

**Figure S13.** The density changes of s orbital states of Al before and after adsorption.

**Figure S14.** The density changes of p orbital states of Al before and after adsorption.

### **Supplementary Tables:**

**Table S1.** The Kinetic models of La-Fe-Al ternary composite oxides.

**Table S2.** The thermodynamic model of La-Fe-Al ternary composite oxides at different temperatures.

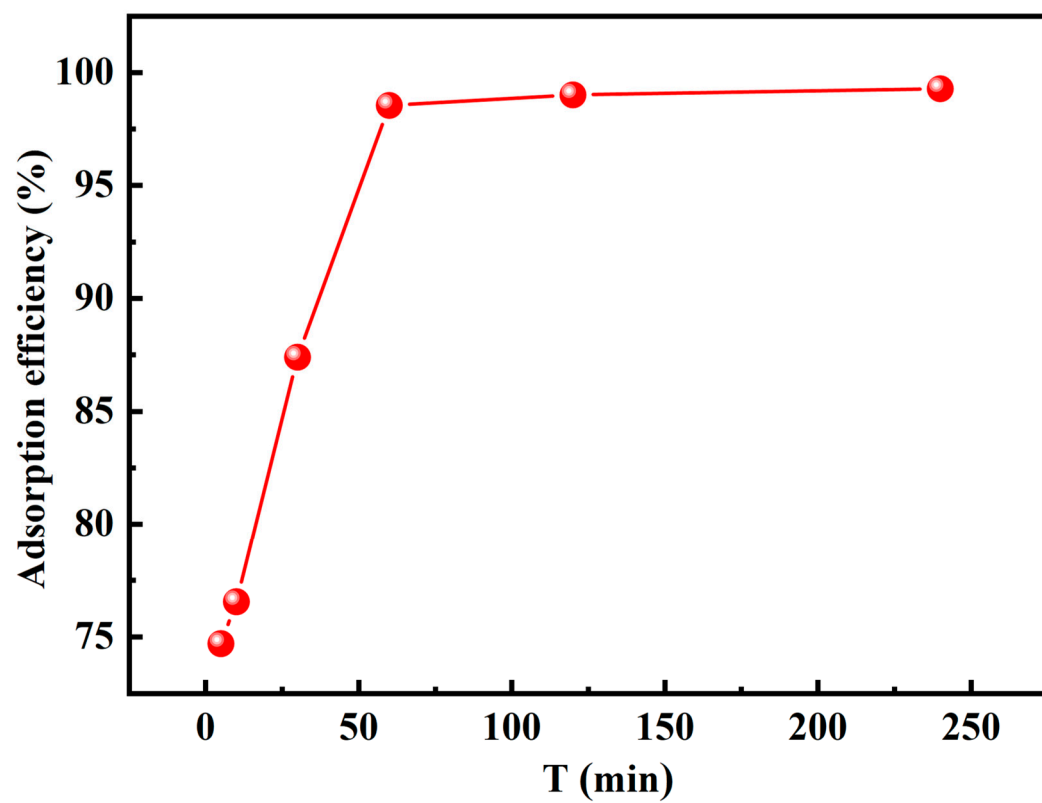

**Figure S1.** Fluoride ions adsorption kinetics curves of La-Fe-Al ternary composite oxides.

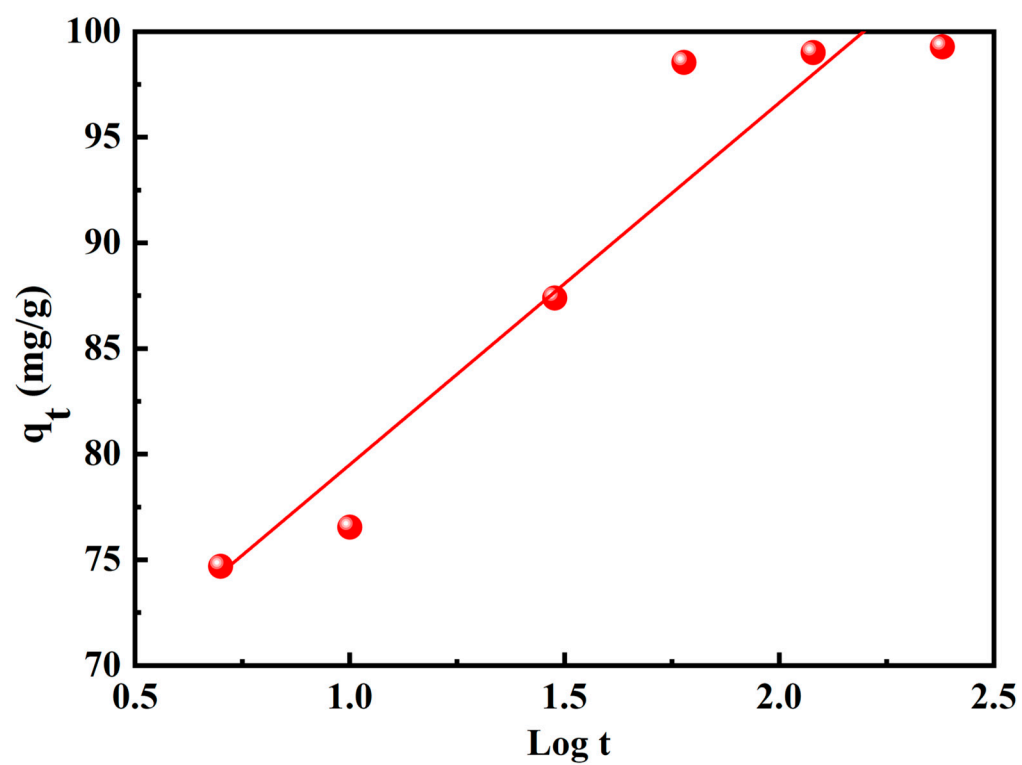

**Figure S2.** Fitting curve of Elovich kinetic model.

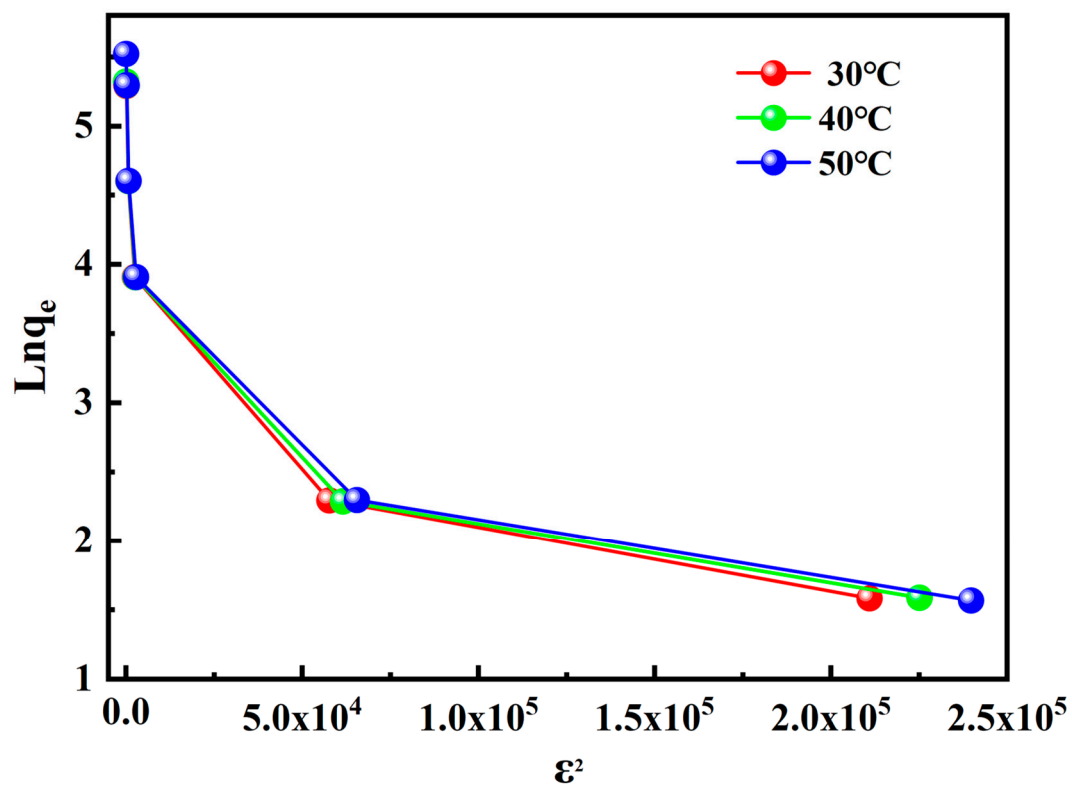

**Figure S3.** Fitting curve of Dubinin-Radushkevich model.

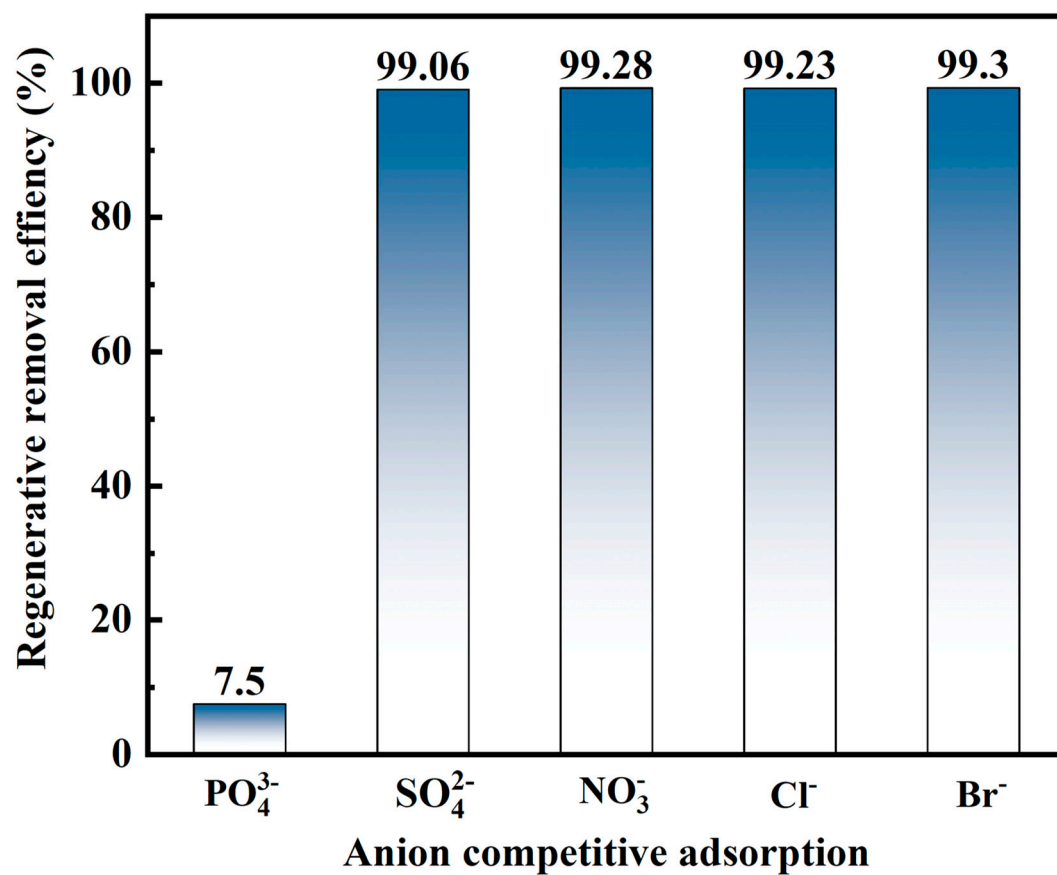

**Figure S4.** Removal efficiency of La-Fe-Al ternary composite oxides under competition of different anions.

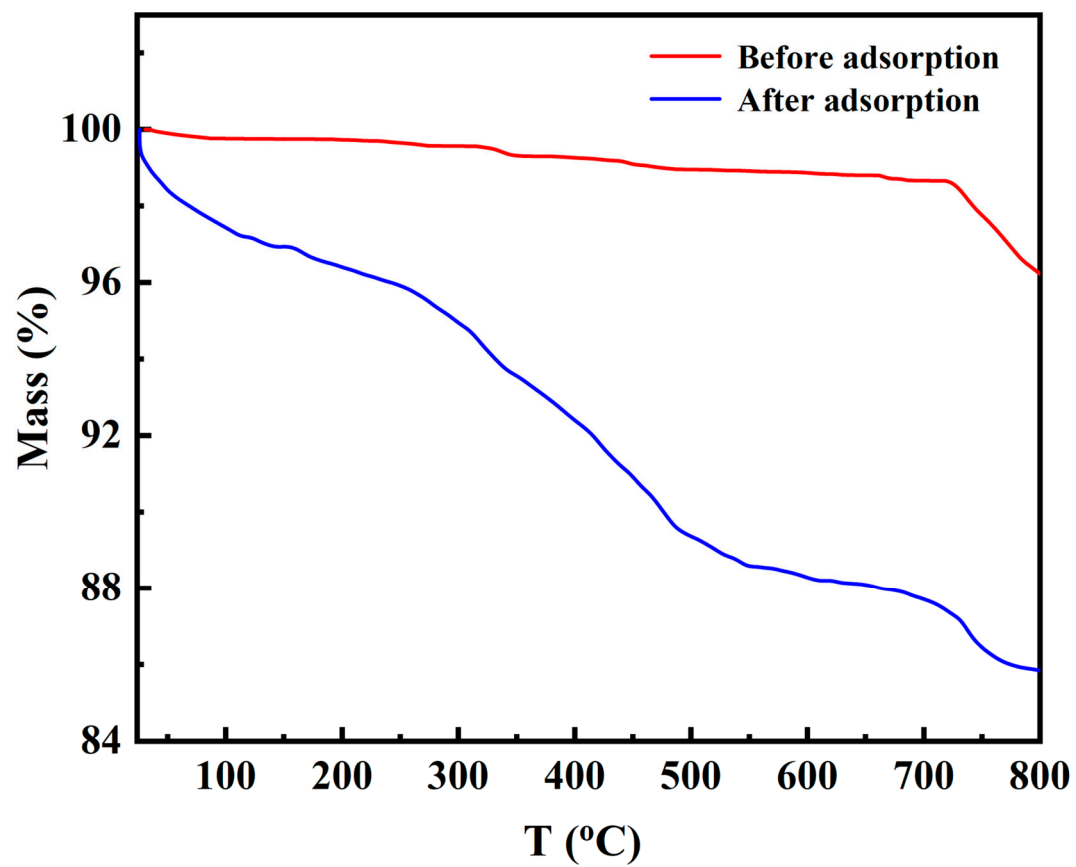

**Figure S5.** The TG diagram before and after adsorption of La-Fe-Al ternary composite oxides.

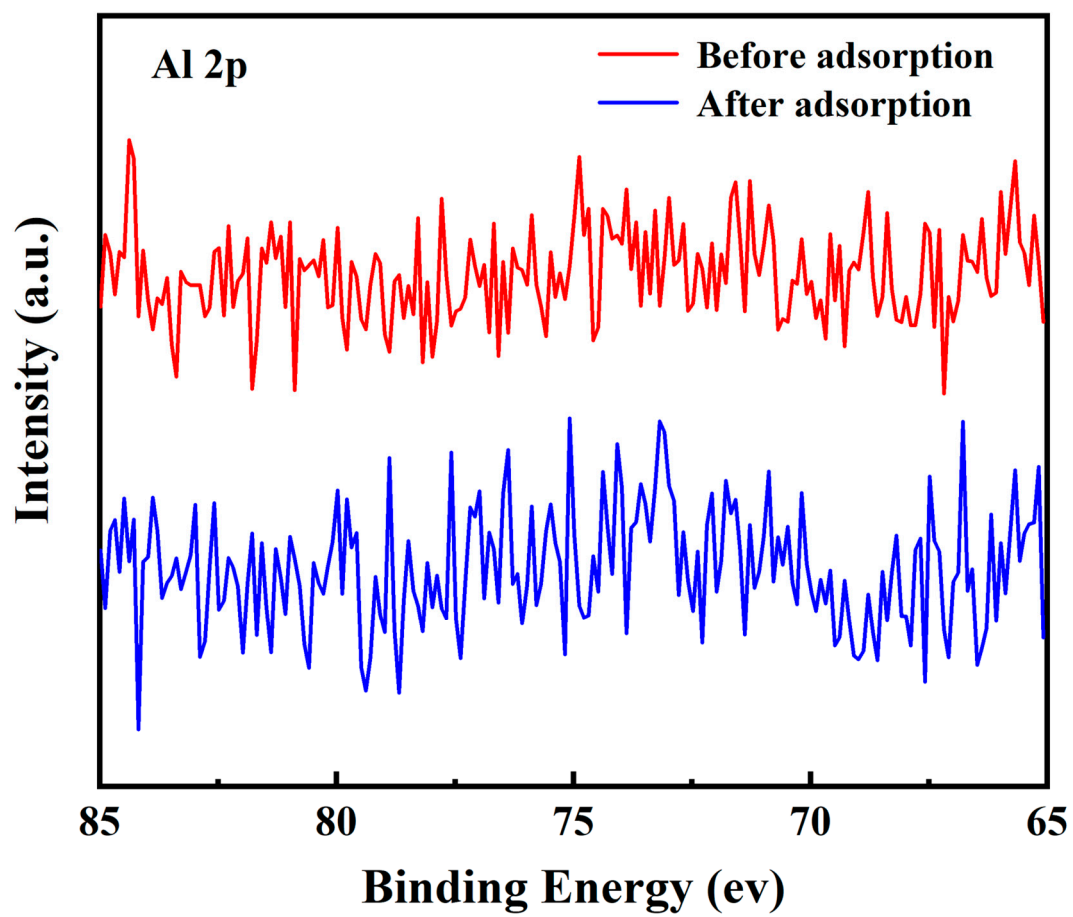

**Figure S6.** High-resolution map of Al 2p.



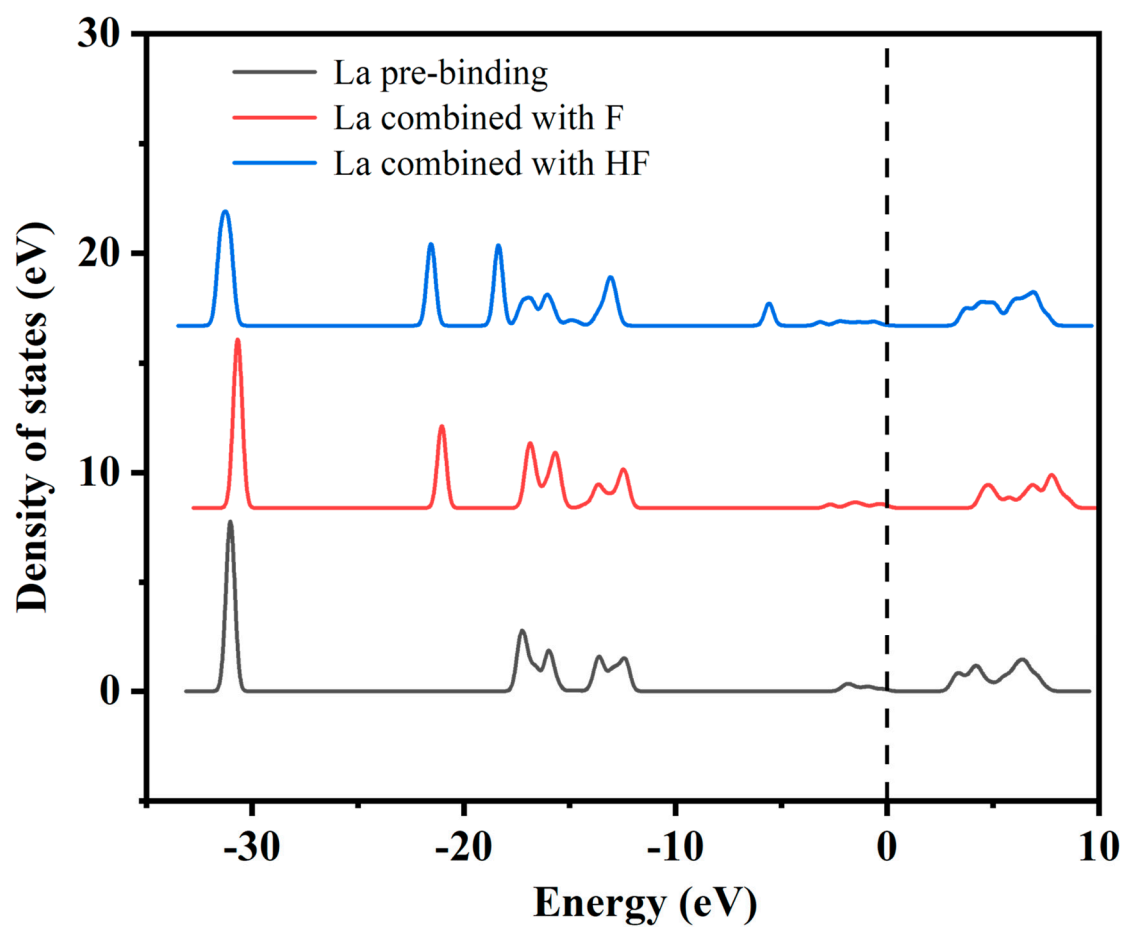

**Figure S7.** The density changes of s orbital states of La before and after adsorption.

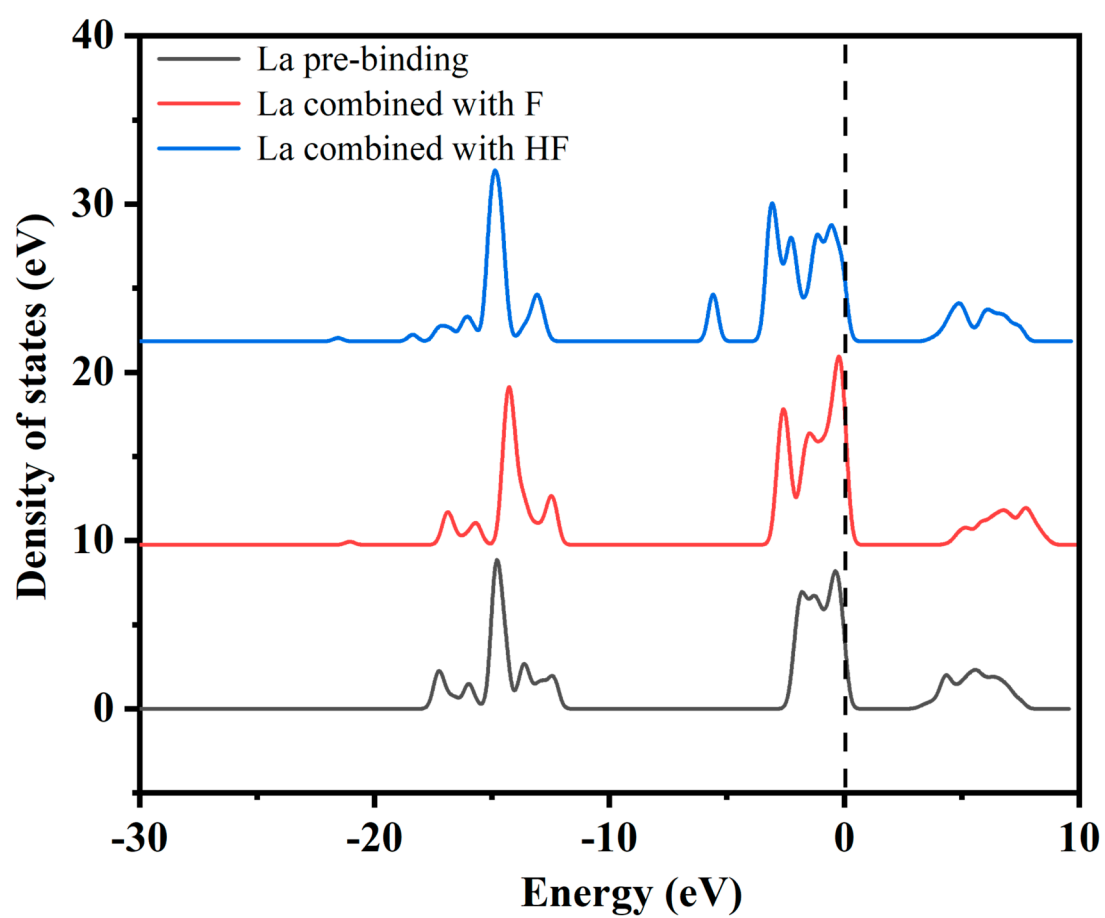

**Figure S8.** The density changes of p orbital states of La before and after adsorption.

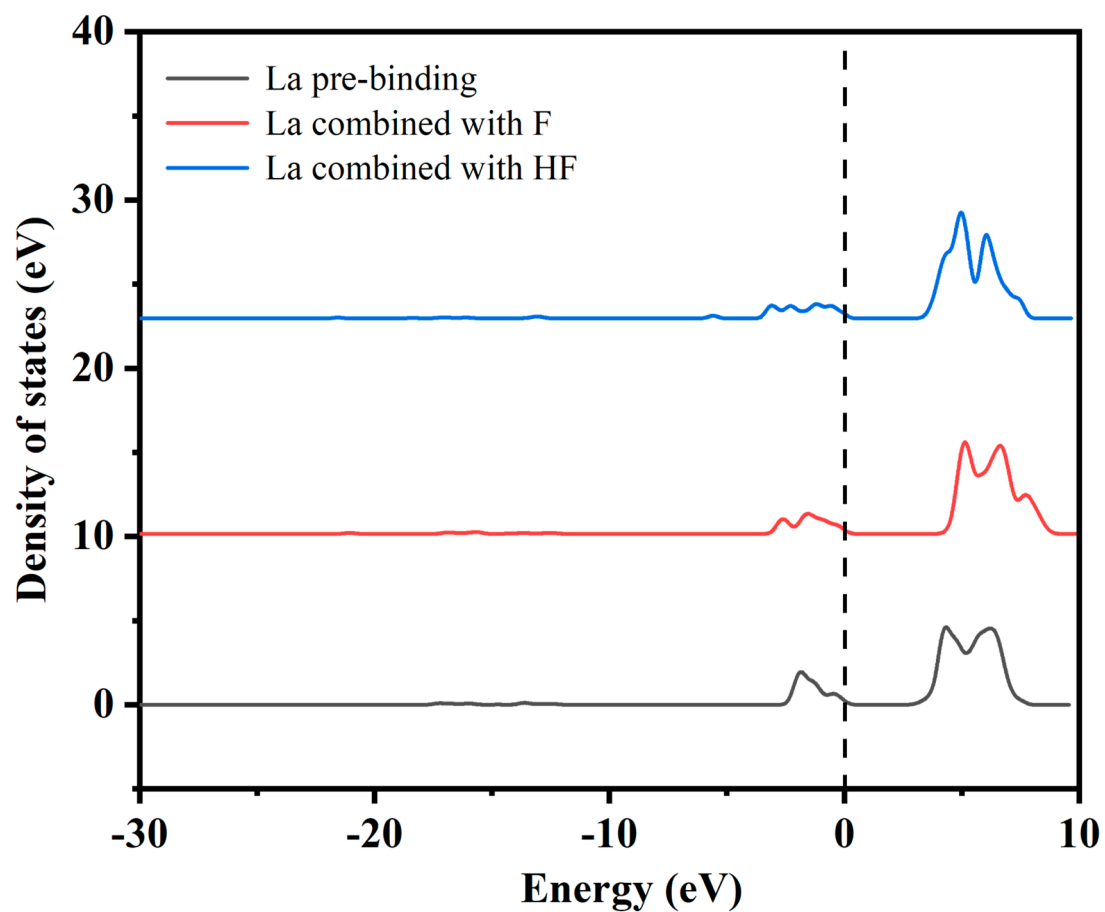

**Figure S9.** The density changes of d orbital states of La before and after adsorption.

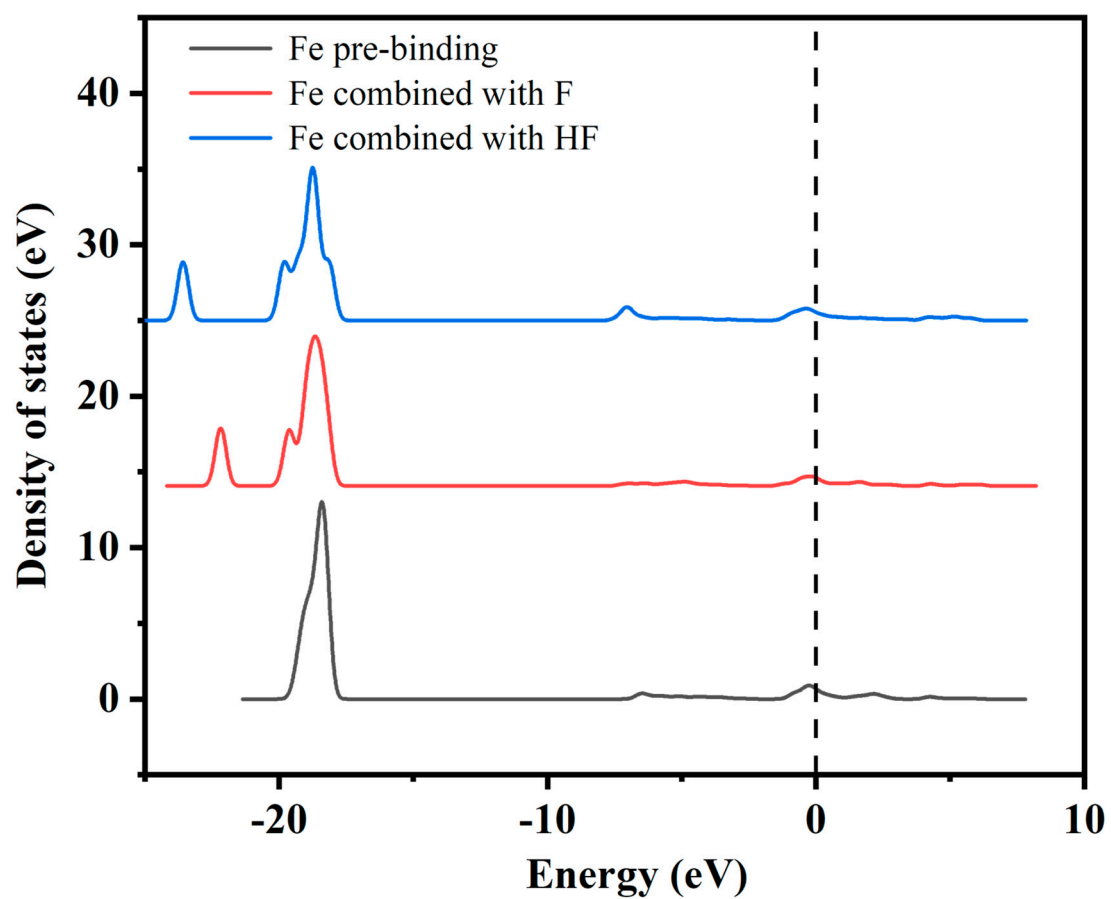

**Figure S10.** The density changes of s orbital states of Fe before and after adsorption.

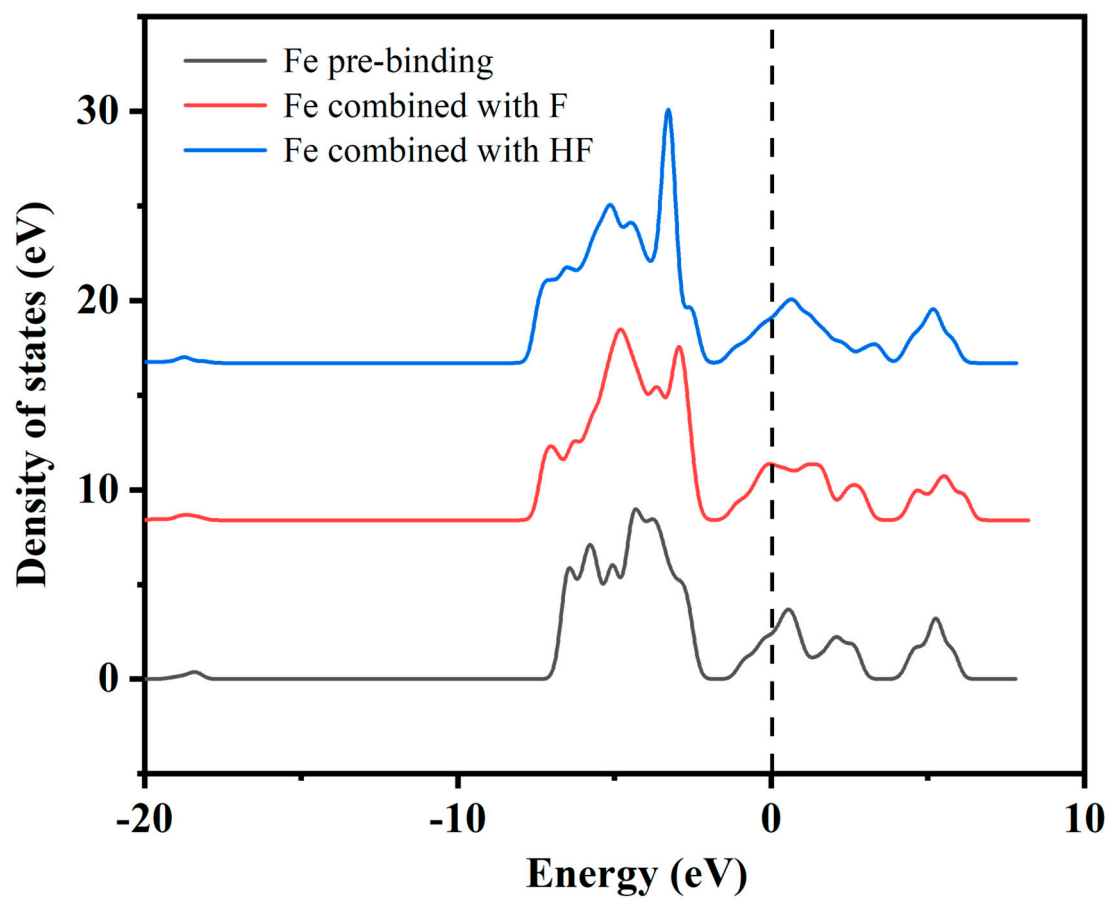

**Figure S11.** The density changes of p orbital states of Fe before and after adsorption.

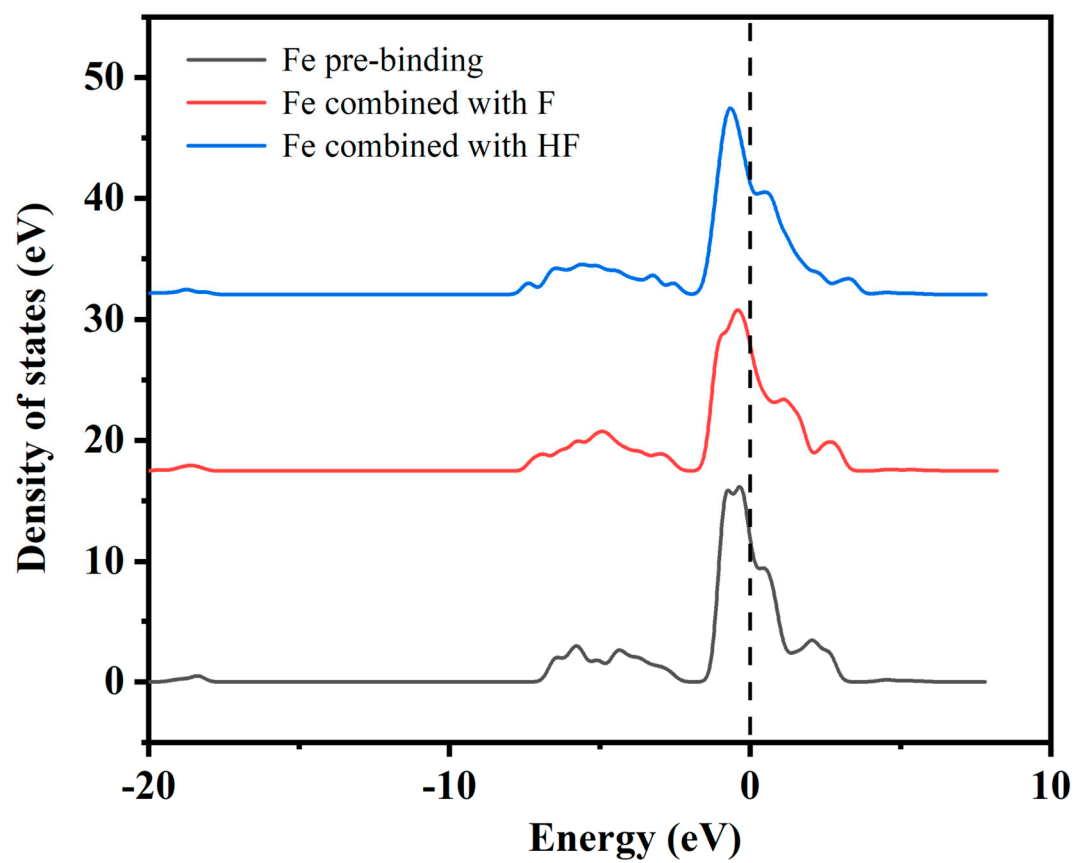

**Figure S12.** The density changes of d orbital states of Fe before and after adsorption.

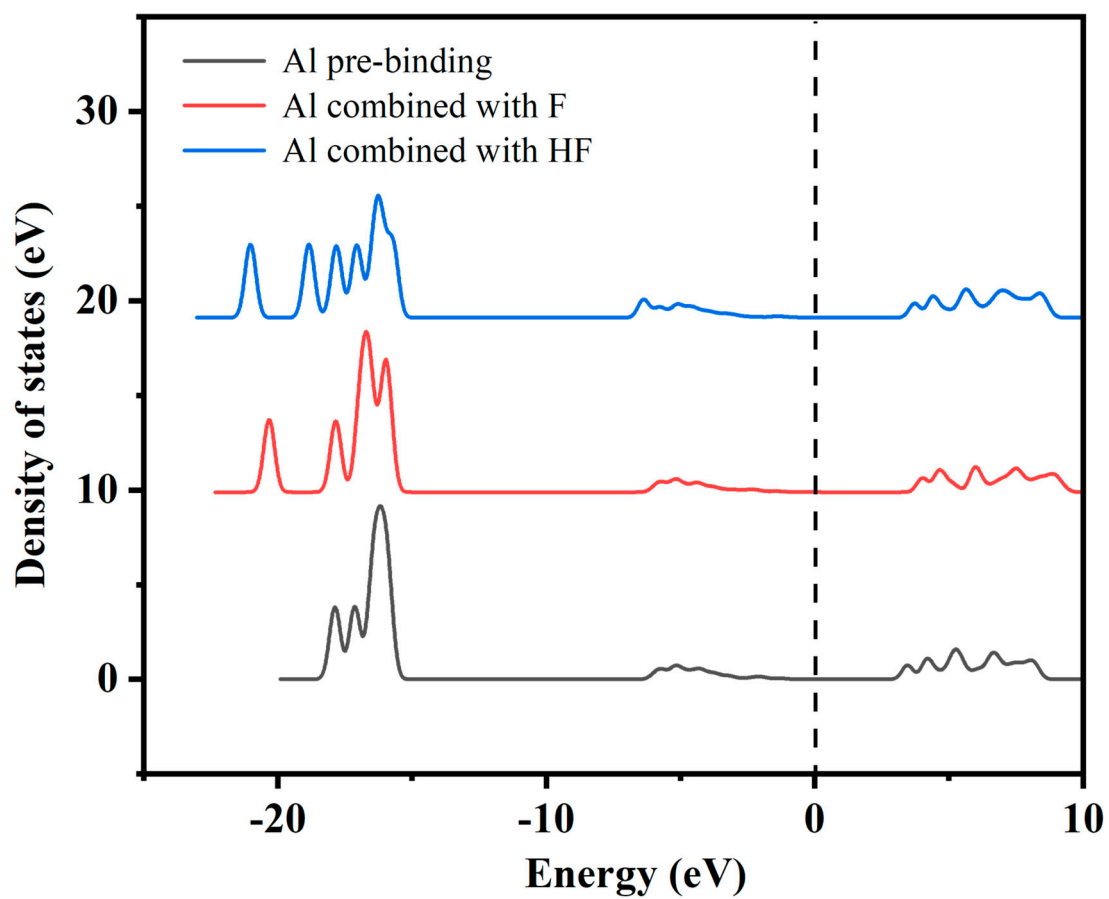

**Figure S13.** The density changes of s orbital states of Al before and after adsorption.

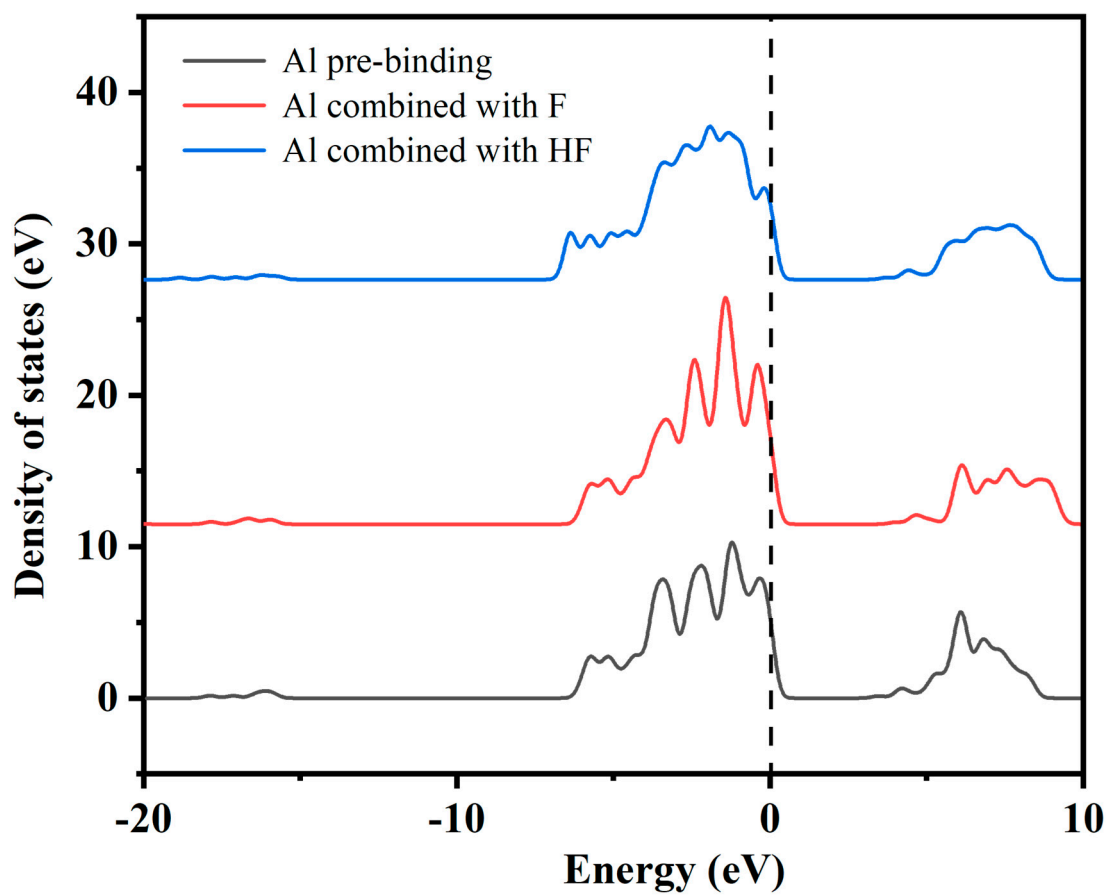

**Figure S14.** The density changes of p orbital states of Al before and after adsorption.



**Table 1.** The Kinetic models of La-Fe-Al ternary composite oxides.

| Pseudo-first-order model                 |                                                                           |                                                            |                            |                |
|------------------------------------------|---------------------------------------------------------------------------|------------------------------------------------------------|----------------------------|----------------|
| C <sub>o</sub> (mg/L)                    | Function                                                                  | k <sub>1</sub> (min <sup>-1</sup> )                        | R <sup>2</sup>             |                |
| 100                                      | $\log(q_e - q_t) = \log q_e - \frac{k_1 t}{2.303}$                        | 0.042                                                      | 0.876                      |                |
| Pseudo-second-order model                |                                                                           |                                                            |                            |                |
| C <sub>o</sub> (mg/L)                    | Function                                                                  | k <sub>2</sub> (g·mg <sup>-1</sup> ·min <sup>-1</sup> )    | q <sub>e</sub> (cal)(mg/g) | R <sup>2</sup> |
| 100                                      | $\frac{t}{q_t} = \frac{1}{k_2 q_e^2} + \frac{t}{q_e}$                     | 0.0039                                                     | 100.50                     | 0.999          |
| Elovich Equation                         |                                                                           |                                                            |                            |                |
| C <sub>o</sub> (mg/L)                    | Function                                                                  | A                                                          | B                          | R <sup>2</sup> |
| 100                                      | q <sub>t</sub> =A+2.303Blogt                                              | 62.383                                                     | 7.436                      | 0.891          |
| Intraparticle Diffusion Kinetic Equation |                                                                           |                                                            |                            |                |
| C <sub>o</sub> (mg/L)                    | Function                                                                  | k <sub>id</sub> (mg·g <sup>-1</sup> ·min <sup>-0.5</sup> ) | C                          | R <sup>2</sup> |
| 100                                      | q <sub>t</sub> =k <sub>id</sub> ·t <sup><math>\frac{1}{2}</math></sup> +C | 1.990                                                      | 74.304                     | 0.700          |
| External Diffusion Kinetic Equation      |                                                                           |                                                            |                            |                |
| C <sub>o</sub> (mg/L)                    | Function                                                                  | k <sub>p</sub> (min <sup>-1</sup> )                        | R <sup>2</sup>             |                |
| 100                                      | $\ln \frac{C_t}{C_0} = -K_p t$                                            | 0.016                                                      | 0.639                      |                |

**Table 2.** The thermodynamic model of La-Fe-Al ternary composite oxides at different temperatures.

| Temperature (°C) | Langmuir model                           |                       |                       | Freundlich model      |                                                           |      | Temkin model                          |                |                |
|------------------|------------------------------------------|-----------------------|-----------------------|-----------------------|-----------------------------------------------------------|------|---------------------------------------|----------------|----------------|
|                  | $q_e = \frac{q_{\max} b C_e}{1 + b C_e}$ |                       |                       | $q_e = K_F C_e^{1/n}$ |                                                           |      | $q_e = \frac{RT}{b_T} \ln(K_T T C_e)$ |                |                |
|                  | R <sup>2</sup>                           | q <sub>m</sub>        | b                     | R <sup>2</sup>        | K <sub>F</sub>                                            | n    | R <sup>2</sup>                        | K <sub>T</sub> | b <sub>T</sub> |
|                  |                                          | (mg·g <sup>-1</sup> ) | (L·mg <sup>-1</sup> ) |                       | (mg <sup>1-(1/n)</sup> L <sup>1/n</sup> g <sup>-1</sup> ) |      |                                       |                |                |
| 30               | 0.901                                    | 241.96                | 0.0087                | 0.834                 | 30.83                                                     | 3.43 | 0.886                                 | 0.00041        | 53.95          |
| 40               | 0.905                                    | 246.64                | 0.0084                | 0.741                 | 17.12                                                     | 2.66 | 0.848                                 | 0.00047        | 60.38          |
| 50               | 0.954                                    | 302.99                | 0.0060                | 0.846                 | 14.07                                                     | 2.34 | 0.885                                 | 0.00040        | 53.91          |
